# Supplementary material
Source: Springer Nature journal article supplement (https://www.springermedizin.de/resource/supplementary/12885_2004_188_MOESM2_ESM.pdf/9469112)

YEDZ

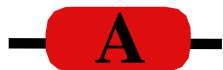

STEAP

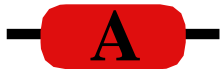

TSAP6

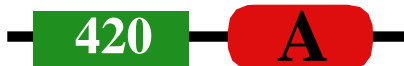

NOX1

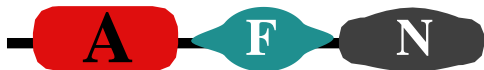

NOX5

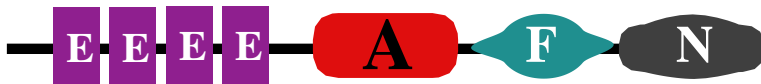

DUOX1

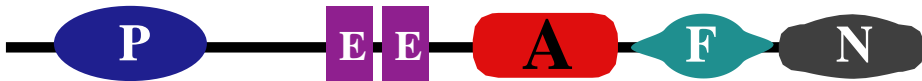

ACRATA

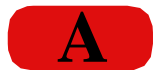

F420\_oxidored

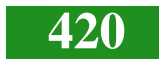

FAD\_binding\_6

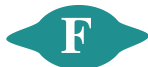

NAD\_binding\_1

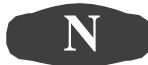

efhand

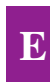

An\_peroxidase

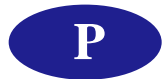

Supplement: MOESM2 [file 9469112]
